# Supplementary material
Source: PubMed Central journal article supplement (PMC3057791)

## Resveratrol potentiates glucose-stimulated insulin secretion in INS-1E $\beta$ -cells and human islets through SIRT1 dependent mechanism.

Laurène Vetterli *et al.*

### SUPPORTING INFORMATION

**Table S1. Primer sequences for quantitative real-time PCR.**

| Gene           | Species                    | Sense (5'-3')                      | Antisense (5'-3')                 |
|----------------|----------------------------|------------------------------------|-----------------------------------|
| <i>Tfam</i>    | rat                        | GGG AAG AGC AAA TGG CTG AA         | TCA CAC TGC GAC GGA TGA GA        |
| <i>Pgc-1a</i>  |                            | TGA CAC AAC GCG GAC AGA AC         | CCG CAG ATT TAC GGT GCA TT        |
| <i>ND6</i>     |                            | TGG GTG GGA TGT TGG TTG TAT        | TCA AGT TTC CGG ATA TTC CTC AGT   |
| <i>Cox1</i>    |                            | AGC TGG CTT CGT CCA CTG ATT        | GGG CTT TTG CTC ATG TGT CAT       |
| <i>Ucp2</i>    |                            | CTT CTG CAC CAC CGT CAT TG         | TAC TGG CCC AAG GCA GAG TT        |
| <i>Glut2</i>   |                            | TCA GCC AGC CTG TGT ATG CA         | TCC ACA AGC AGC ACA GAG ACA       |
| <i>GK</i>      |                            | GTG GAT GGC TCC GTG TAC AAG        | ACT GTG GGT TGA CGC TTT AG        |
| <i>Insulin</i> |                            | TGC TCA CCC GCG ACC TT             | GTT CAT ATG CAC CAC TGG ACT GAA   |
| <i>Pdx-1</i>   |                            | CCG CGT TCA TCT CCC TTT C          | CTC CTG CCC ACT GGC TTT T         |
| <i>PC</i>      |                            | GGCGAATTCCGATGGCAATCTCACCTCTGTGGC  | GGC TTG AGG CGA CGG GGC GAA G     |
| <i>TfIIb</i>   |                            | GTT CTG CTC CAA CCT TTG CCT        | TGT GTA GCT GCC ATC TGC ACT T     |
| <i>Hnf-1a</i>  |                            | CCC AGC TGC AGA GCC CCC AC         | TGA AGA CCT GCT TGG TGG GCG TGA G |
| <i>Hnf-4a</i>  |                            | TGT AGT CAT TGC CTA GGA GCA GCA C  | ATG GGC CAA GTA CAT CCC GGC C     |
| <i>FoxO1</i>   |                            | GGC TAG GAG TTA GTG AGC AGG CAA    | GGA CTG CTC CTC AGT TCC CGG T     |
| <i>Sirt1</i>   |                            | CAG TGT CAT GGT TCC TTT GC         | CAC CGA GGA ACT ACC TGA T         |
| <i>TFAM</i>    | human                      | CCC AGA TGC AAA AAC TAC AGA ACT AA | TCC GCC CTA TAA GCA TCT TGA T     |
| <i>PGC-1a</i>  |                            | TGG AGT GAC ATT GTG CTG CTC        | TCT GGG CAA AGA GGC TGG T         |
| <i>UCP2</i>    |                            | CAA GGA TGC CCT CCT GAA AG         | TGG CAA GGG AGG TCA TCT GT        |
| <i>GLUT2</i>   |                            | TTC CGG AAT CAA TGG CAT TT         | TGT TTA CAG CGC CAA CTC CA        |
| <i>GK</i>      |                            | TGC ATT TCC ACA CTG TCA GA         | CTC CCC ACA CAG GAT GAG TT        |
| <i>Insulin</i> |                            | GCA GCC TTT GTG AAC CAA CA         | CGT TCC CCG CAC ACT AGG TA        |
| <i>Pdx-1</i>   |                            | GCA CTC CAC CTT GGG ACC T          | CTT CCC CGC TGT GTG TGT TA        |
| <i>tubulin</i> |                            | GAG GCT GAC GCA GAA TGC A          | TCT GTG GCA ATC CGG TTC A         |
| <i>HNF-1a</i>  |                            | AGC GGG AGG TGG TCG ATA C          | CAT GGG AGT GCC CTT GTT G         |
| <i>HNF-4a</i>  |                            | AGA GGA ACC AGT GCC GCT ACT        | CTG GAC GGC TTC CTT CTT CA        |
| <i>FoxO1</i>   | CGT CCG TCC GTC CTT CCG TC | AAC TTC GCG GGG CCA TCC AC         |                                   |

### Figure S1

Mitochondria isolated from INS-1E cells were subjected to immunoblotting analysis. The representative immunoblotting shows 3 independent mitochondrial extracts from Control (Ctrl) and resveratrol-treated (RSV) cells with mitochondrial respiratory chain subunits of the 5 complexes (ND6 for complex I, FeS for complex II, COX I for complex IV, core2 for complex III, and  $\alpha$  subunit for complex V).

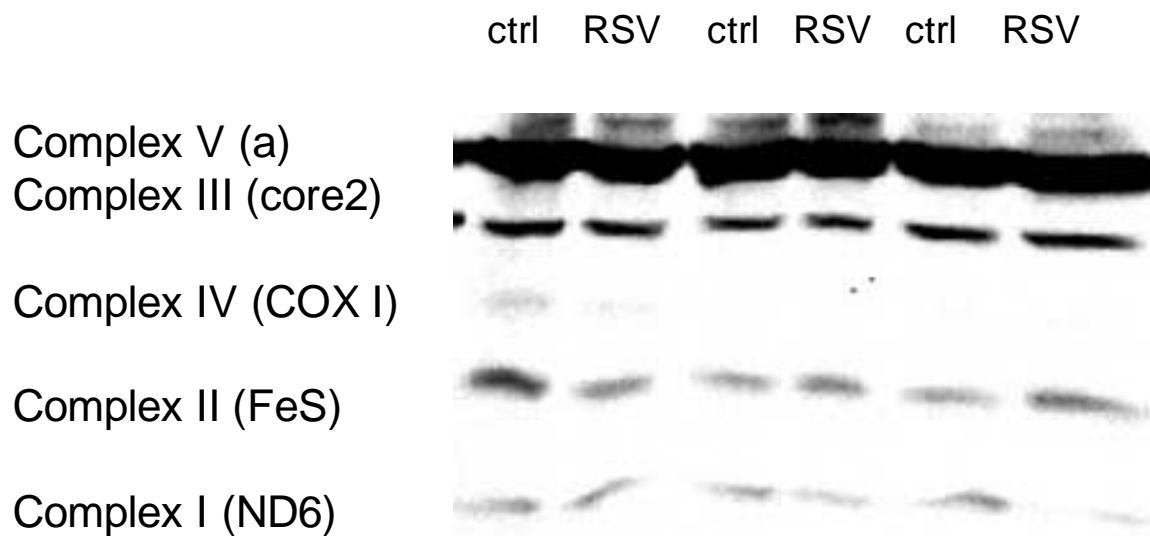

### Figure S2

INS-1E cell extracts were analyzed by immunoblotting as described in the Methods section. The representative immunoblotting shows Sirt1 protein levels compared to  $\beta$ -actin.

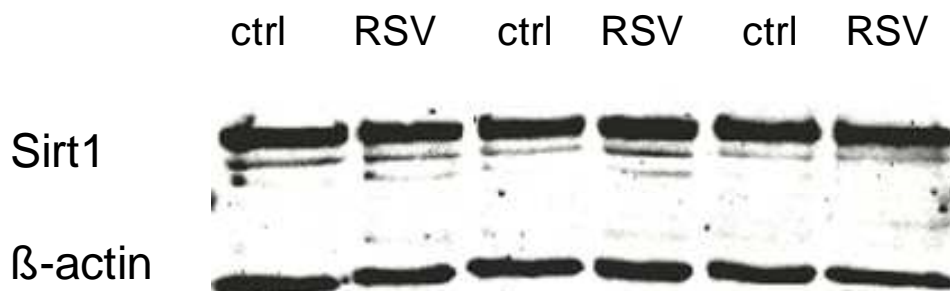

Supplement: supp_M110.176842_jbc.M110.176842-1.pdf [file supp_M110.176842_jbc.M110.176842-1.pdf]
